# Supplementary material for: Burden of SARS-CoV-2 infection in healthcare workers during second wave in England and impact of vaccines: prospective multicentre cohort study (SIREN) and mathematical model
Source: PubMed Central journal article supplement (PMC9295077; doi:10.1136/bmj-2022-070379), 2022-07-20
Supplement: popd070379.ww1.pdf [file popd070379.ww1.pdf]

## Appendix 1: Mathematical Modelling Methods

An individual-based model of the spread of COVID-19 in English hospitals:

### **Overview, Design Concepts, and Details (ODD) Protocol:**

We have developed an individual-based model (IBM) of the transmission of COVID-19 in an English hospital and use the ODD protocol,<sup>1</sup> to provide a complete and rigorous model description of the model used for the simulations described in the “Mathematical Model” section of the main document’s methods.

### **Purpose:**

The purpose of the model is to represent the acquisition and transmission of SARS-CoV-2 by patient-facing healthcare workers (HCWs) and patients in a typical English hospital and answer questions around the source of infection and the effectiveness of interventions.

### **Entities, state variables and scales:**

The model contains two environment classes, namely the Community and the Hospital. The Community class tracks the change in community prevalence per day and determines the number of community-acquired symptomatic and exposed cases to admit to hospital. The Hospital class stores the agent lists and handles the creation of newly admitted agents as well as the removal of patients that are to be discharged. There are two types of agents in the model, Patients, and HCWs, both of which inherit basic variables from the abstract People class.

**Table 1: States and variables of model agents.**

| <i>Variable</i>             | <i>Definition</i>                                                                                                                                                                                                                                                                                                      |
|-----------------------------|------------------------------------------------------------------------------------------------------------------------------------------------------------------------------------------------------------------------------------------------------------------------------------------------------------------------|
| <b>Community</b>            |                                                                                                                                                                                                                                                                                                                        |
| <i>prevalence</i>           | Population prevalence at current time-step. Taken to be 1.5*admissions rate per bed (See <b>Error! Reference source not found.</b> ).                                                                                                                                                                                  |
| <i>infCases</i>             | Number of people currently infected. It is the product of population size and prevalence                                                                                                                                                                                                                               |
| <i>expCases</i>             | Number of people exposed in community<br>$infCases * 1/(1-asymptomaticProb)$                                                                                                                                                                                                                                           |
| <i>region</i>               | Region to be simulated from:<br>"North West", "North East and Yorkshire", "South West", "South East", "London", "Midlands", "East of England"                                                                                                                                                                          |
| <i>prop_alpha_comm/hosp</i> | Proportion of cases in the community or hospital admissions that are with Alpha variant.                                                                                                                                                                                                                               |
| <i>ld_alpha</i>             | Logistic distribution for proportion of community-acquired hospital cases that are Alpha variant.                                                                                                                                                                                                                      |
| <i>ld_vacc_age_group</i>    | Logistic distribution for vaccination probability in new admissions. Age groups are: 16-49, 50-54, 55-59, 60-64, 65-69, 90-74, 75-79, 80+.                                                                                                                                                                             |
| <b>Hospital</b>             |                                                                                                                                                                                                                                                                                                                        |
| <i>hospital</i>             | Array list containing <i>Parameters.wards</i> ‘wards’ that are also array lists, each of which contains <i>Parameters.shared_bays</i> ‘bays’ (also array lists) that contain <i>Parameters.bedsPerBay</i> ‘beds’, where each position in the beds array list either contains a single patient agent or is set to null. |
| <i>red_wards</i>            | Array list of the position of those wards that contain known or suspected COVID-19 patients in the hospital ward array list                                                                                                                                                                                            |
| <i>green_wards</i>          | Array list of the position of those wards that contain no known or suspected COVID-19 patients in the hospital ward array list                                                                                                                                                                                         |
| <i>red_to_green_wards</i>   | Array list of the position of those wards to move from red to green at the                                                                                                                                                                                                                                             |

|                              |                                                                                                                                                                                                                                                                                                                                                                                                                                                                                                                                                                                                                                                                       |
|------------------------------|-----------------------------------------------------------------------------------------------------------------------------------------------------------------------------------------------------------------------------------------------------------------------------------------------------------------------------------------------------------------------------------------------------------------------------------------------------------------------------------------------------------------------------------------------------------------------------------------------------------------------------------------------------------------------|
|                              | end of the time-step                                                                                                                                                                                                                                                                                                                                                                                                                                                                                                                                                                                                                                                  |
| <i>green_to_red_wards</i>    | Array list of the position of those wards to move from green to red at the end of the time-step                                                                                                                                                                                                                                                                                                                                                                                                                                                                                                                                                                       |
| <i>hcws_on_wards</i>         | Array list containing a separate array list for each ward that records which HCWs have visited that ward in a time-step                                                                                                                                                                                                                                                                                                                                                                                                                                                                                                                                               |
| <i>infectedPatientsByBay</i> | Map of the number of patient agents in each bay that are infected                                                                                                                                                                                                                                                                                                                                                                                                                                                                                                                                                                                                     |
| <b>People</b>                |                                                                                                                                                                                                                                                                                                                                                                                                                                                                                                                                                                                                                                                                       |
| <i>id</i>                    | Unique identifier for agents                                                                                                                                                                                                                                                                                                                                                                                                                                                                                                                                                                                                                                          |
| <i>Infection_Status</i>      | Enum for infection states. One of:<br>NONE (never infected),<br>EXPOSED (infected but not yet detectable or infectious. After a pre-defined incubation period these individuals transition to one of the infectious states),<br>INFECTED_P (pre-symptomatically infected, PCR-detectable and infectious but not yet symptomatic. These individuals become symptomatically infected after a pre-defined onset period has passed),<br>INFECTED_A (asymptomatically infected, PCR-detectable and infectious),<br>INFECTED_S (symptomatically infected, PCR-detectable and infectious),<br>RECOVERED (recovered/immune, non-infectious, assumed to be a permanent state). |
| <i>Infection_status</i>      | Current infection status                                                                                                                                                                                                                                                                                                                                                                                                                                                                                                                                                                                                                                              |
| <i>recoveryStep</i>          | Time-step to recover from infection (if no infection then 1000000000)                                                                                                                                                                                                                                                                                                                                                                                                                                                                                                                                                                                                 |
| <i>incubationPeriod</i>      | Time-step to transition from exposed to pre-symptomatic (if no infection then 1000000000)                                                                                                                                                                                                                                                                                                                                                                                                                                                                                                                                                                             |
| <i>onsetPeriod</i>           | Time-step from pre-symptomatic to symptomatic (if no infection then 1000000000)                                                                                                                                                                                                                                                                                                                                                                                                                                                                                                                                                                                       |
| <i>Type</i>                  | Enum for type of person agent (Patient/HCW)                                                                                                                                                                                                                                                                                                                                                                                                                                                                                                                                                                                                                           |
| <i>type</i>                  | Type of this agent                                                                                                                                                                                                                                                                                                                                                                                                                                                                                                                                                                                                                                                    |
| <i>Gender</i>                | Enum for gender. Male/Female                                                                                                                                                                                                                                                                                                                                                                                                                                                                                                                                                                                                                                          |
| <i>gender</i>                | Gender of person agent                                                                                                                                                                                                                                                                                                                                                                                                                                                                                                                                                                                                                                                |
| <i>communityInfection</i>    | Boolean for whether agents have a community acquired infection or not                                                                                                                                                                                                                                                                                                                                                                                                                                                                                                                                                                                                 |
| <i>timeInSim</i>             | Length of time agent has been in simulation                                                                                                                                                                                                                                                                                                                                                                                                                                                                                                                                                                                                                           |
| <i>infected_by</i>           | Type and ID of agent that caused the infection (or Comm if infected in the community).                                                                                                                                                                                                                                                                                                                                                                                                                                                                                                                                                                                |
| <i>infection_type</i>        | Direct or indirect                                                                                                                                                                                                                                                                                                                                                                                                                                                                                                                                                                                                                                                    |
| <i>vaccinated1</i>           | Boolean for whether person ever received a first dose of vaccine                                                                                                                                                                                                                                                                                                                                                                                                                                                                                                                                                                                                      |
| <i>vaccinated2</i>           | Boolean for whether person ever received a second dose of vaccine                                                                                                                                                                                                                                                                                                                                                                                                                                                                                                                                                                                                     |
| <i>infected</i>              | Boolean for whether person was ever infected                                                                                                                                                                                                                                                                                                                                                                                                                                                                                                                                                                                                                          |
| <i>vaccinationDay1</i>       | Day that individual will become (HCWs) or became (patients) effectively vaccinated following a first dose of a vaccine                                                                                                                                                                                                                                                                                                                                                                                                                                                                                                                                                |
| <i>vaccinationDay2</i>       | Day that individual will become (HCWs) or became (patients) effectively vaccinated following a first dose of a vaccine                                                                                                                                                                                                                                                                                                                                                                                                                                                                                                                                                |
| <i>StrainCarried</i>         | Enum for possible strains to be carried (B1_1_7, OTHER}                                                                                                                                                                                                                                                                                                                                                                                                                                                                                                                                                                                                               |
| <i>strain_carried</i>        | Strain carried by infected individual                                                                                                                                                                                                                                                                                                                                                                                                                                                                                                                                                                                                                                 |
| <b>Patients</b>              |                                                                                                                                                                                                                                                                                                                                                                                                                                                                                                                                                                                                                                                                       |
| <i>Ward</i>                  | Enum for ward type. One of: NEW_ADMISSION, GENERAL, SUSPECTED, TEST_NEG, TEST_POS, DISCH                                                                                                                                                                                                                                                                                                                                                                                                                                                                                                                                                                              |
| <i>dischargeTimeSteps</i>    | The time in steps that a patient will be discharged                                                                                                                                                                                                                                                                                                                                                                                                                                                                                                                                                                                                                   |
| <i>dead</i>                  | Boolean for live/dead patient                                                                                                                                                                                                                                                                                                                                                                                                                                                                                                                                                                                                                                         |
| <i>knownInfected</i>         | Boolean for identified infection                                                                                                                                                                                                                                                                                                                                                                                                                                                                                                                                                                                                                                      |
| <i>readmission</i>           | Boolean for whether patient has been readmitted or not                                                                                                                                                                                                                                                                                                                                                                                                                                                                                                                                                                                                                |

|                              |                                                                                                                 |
|------------------------------|-----------------------------------------------------------------------------------------------------------------|
| <i>timeSinceDisch</i>        | Number of time-steps that the patient has been discharged for                                                   |
| <i>carehome</i>              | Boolean for whether patient is from a care home or not                                                          |
| <i>followOnDisch</i>         | Boolean for whether patient should be followed up on discharge or not.                                          |
| <i>tested</i>                | Flag for whether patient was tested again after 5-7 days (to ensure they only get tested once in this interval) |
| <b>HCWs</b>                  |                                                                                                                 |
| <i>onShift</i>               | Boolean for whether HCW is currently on shift or at home                                                        |
| <i>absentThroughSickness</i> | Boolean for whether HCW is currently isolating                                                                  |
| <i>stepToReturn</i>          | Time-step to end self-isolation and return to work                                                              |
| <i>shiftStartStep</i>        | Time-step that shift began or will begin if currently off shift                                                 |
| <i>shiftEndStep</i>          | Time-step that shift ended or will end if currently on shift                                                    |
| <i>tested</i>                | Boolean variable for whether HCW has been tested                                                                |

### Process overview and scheduling:

The model runs with a 4-hour time-step, i.e. six time-steps per day. Currently all agents are on the same time-step schedule and are handled by the agent scheduler built into the Multi-Agent Simulator of Neighbourhoods toolkit (MASON),<sup>2</sup> which randomly shuffles agents so that there is no order of which class/agent is stepped first, so the order of the processes active at every time-step described here is arbitrary.

**Community:** When a community object is instantiated, it randomly selects a region and reads in the admissions data for that region from the file “region\_name.csv”. Every time the community object is stepped it performs three basic tasks. It updates the prevalence variable in line with the admissions data that has been read in, calculated the number of infected cases in the community, and calculated the number of exposed cases in the community. The parameters for the logistic curves defining the proportion of hospital cases that are with the Alpha variant are different between regions. This distribution and the vaccination probability over time by five-year age bands are generated when the community object is instantiated.

**Hospital:** At the very first time-step the function *setupHospital* that reads in the number of HCWs and beds from the parameter file and creates all the HCW and patient agents required, each with *infection\_status* = NONE, and randomly assigns each HCW’s *onShift* variable. At each subsequent time-step the number of infected, susceptible, and exposed to admit from the community in this 24-hour period is calculated. The number of infected patients to admit is taken from the admissions file in the community object, and the *communityInfection* variable is set to true, then for a random number of the remaining empty beds patients are admitted as either susceptible or exposed. The exposure probability is proportional to the number of infected patients being admitted at that time (*Patients.expOnAdmissionProb* in the parameter file). Next the hospital’s ward classifications are updated: making any red wards that have no known or suspected COVID-19 patients green and any wards with known or suspected COVID-19 patients red. Finally the list of HCWs that visit the ward in that time-step is reset ready for the next iteration of the hospital. On admission patients are assigned a length of stay (LOS) from a Weibull distribution that is a function of their age, gender, and infection status. The hospital is divided into *wards* “wards” with *shared\_bays* “bays” in each ward and *bedsPerBay* beds in each bay (default *bedsPerBay* = 6). There are two locations for HCWs in a hospital instance, either in the hospital (can interact with all other HCWs in the hospital) or out of the hospital (implicitly interact with the community), and HCWs that are in the hospital interact with patients by randomly selecting beds within bays within wards to visit, during which time they interact with only the patient in that bed and no other patients or HCWs. Other spatial aspects of a hospital (wards, corridors, offices etc) are not explicitly represented. A subset of HCWs are defined to be *wardBased*, those HCWs only select a bed/bay to visit since their activities are restricted to a single ward defined on admission.

**People:** At each time-step every person agent which has *infection\_status* = NONE calculates the probability of becoming exposed based on the number of infected patients they are exposed to on each ward, the number of infected HCWs they are exposed to in the hospital (randomly sampled from the number of infected HCWs and non-infected HCWs), and the transmission rates *bP2P*, *bP2H*, *bH2H* and *bH2P* from the parameter file. The transmission probabilities are assumed to be the absolute probability of transmission across all possible modes (airborne, aerosol, fomite) from each specified source. People that have *infection\_status* = EXPOSED are assigned an incubation period from a Gamma distribution after which time they become asymptotically or pre-symptomatically infected and are assigned a recovery time-step from a Gamma distribution. People with *infected\_status* = INFECTED\_P are assigned an onset period from a log-normal distribution after which time they transition to INFECTED\_S. When the recovery time-step is exceeded, people have *infection\_status* RECOVERED, and are immune to future infections (as reinfections were rare during this stage in the pandemic)<sup>3,4</sup>. If the person agent is a Patient then when they become infected a new LOS is generated. Currently there is no rule stating that this should be greater than the original LOS. Note that the recovery time-step can be greater than the LOS.

**Patients:** As well as undergoing the behaviours that apply to all People agents in the hospital, patients can be tested on admission and are assigned to either single rooms or multiple bed bays, selected following the flow diagram in **Error! Reference source not found.** They are also discharged and those that have an *infection\_status* of EXPOSED or INFECTED\_P on admission are stepped for a further 14 days. During this time, the same Patient agent may be readmitted to hospital. On admission patients may have been vaccinated with one or two doses of a vaccine, with the vaccination probability being drawn from the dose-specific logistic distribution for their age group from the Community class. We took vaccination data from National Immunisation Management System (NIMS), with population denominators taken from Office for National Statistics (ONS) population predictions for 2020,<sup>5</sup> stratified for age-band included in the Joint Committee on Vaccination and Immunisation (JCVI) priority list.<sup>6</sup> It is assumed that no COVID-19 admissions are vaccinated at this stage. Patients that share a bay with an infected patient can be infected directly with transmission probability *bP2P* and all patients in the ward can become infected indirectly by any other infected patient based on the number of infected patients in the hospital with probability *P2P\_hosp*. Patients can also be directly or indirectly infected by any infected HCW that is on shift with probability *bH2P*, or indirectly by a patient where there is shared HCW contacts again with probability *bP2P\_hosp*. We have calibrated these probabilities to reproduce observed data on the proportion of inpatients infected at an individual secondary healthcare organisation (Trust) level.

**HCW:** In addition to the behaviours exhibited by all People agents, HCWs iterate between on and off shift, where they are infected by either other people in the hospital (if *onShift* = true) or with a probability of  $0.13 * \beta * \text{community prevalence per day}$  if *onShift* = false. This is derived from data stating that each case has on average seven contacts. If 1.4 million/66.4 million people work for the NHS,<sup>7</sup> that means that ~2% of people in England are classed as HCWs in this setting, therefore the probability of one of these seven contacts being a HCW is  $1 - (\text{probability none of them are}) = 1 - 0.98^7 = 0.136$ . For each contact the transmission rate is approximately 0.4 thus the probability of a HCW picking up an infection in the community is  $0.136 * 0.4 * \text{community incidence rate}$  (prevalence/4.6 days) where 0.4 is the transmission rate in the community.<sup>8</sup> HCW agents can also self-isolate while their *infection\_status* is INFECTED\_S, they can also be periodically tested with lateral flow device (LFD) tests and those with positive results are forced to isolate, with two days isolation following a false positive or ten days isolation following a true positive. HCWs that have been isolating following a true positive are automatically classed as RECOVERED when returning to work. The time that a HCW will become vaccinated (for first and second doses) is assigned on

instantiation and is selected from dose-specific logistic distribution, we calculated the distribution function parameters from SIREN study participants linked with NIMS.

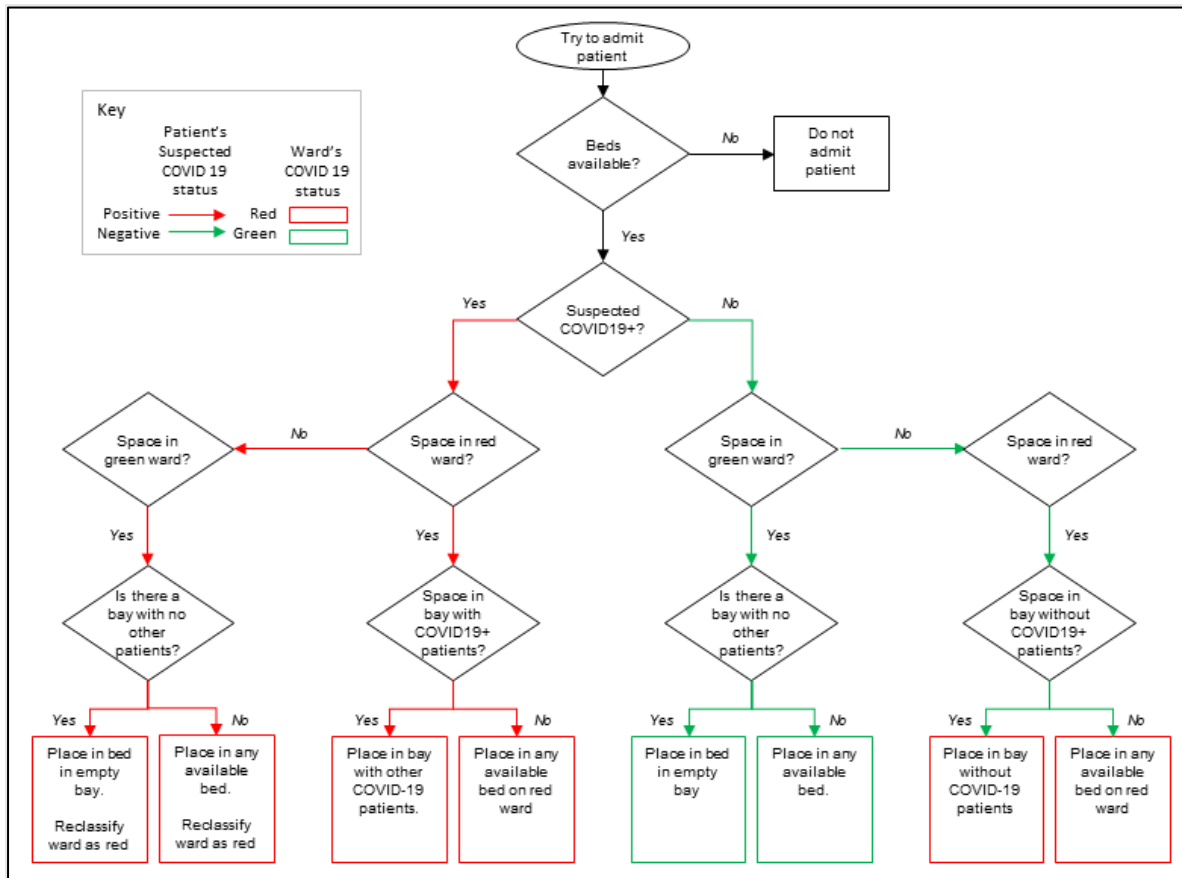

**Figure 1: Schematic of assignment of patients to beds.**

**Design Concepts:**

The model is designed with the structure demonstrated in Additional Figure 3 in the Supplementary Information: Additional Tables and Figures.

The emergent properties of this model are number of infected patients and HCWs over time and the sources of infection. Parameter uncertainty is introduced by using probabilities for infection rates and the inclusion of LOS, incubation, onset, recovery, and vaccination variables drawn from probability distributions.

We parameterised this model for a typical English hospital with 1000 beds and 8000 HCWs to reflect the average bed size to staff ratio in NHS England (NHSE) Trusts. We estimated death rates and length of stay distributions using the R library *fitdistrplus*,<sup>9</sup> and data from the Secondary Uses Service (SUS) COVID-19 linked to laboratory data of positive tests from Public Health England’s Second Generation Surveillance System (SGSS) (methodology as in Bhattacharya et al.).<sup>10</sup> The death probability was estimated by fitting a polynomial to the average probability of dying in hospital per year of age multiplied by the discharge probability from the SUS dataset, sampling the age distribution from the SUS dataset, and taking the mean. For susceptible individuals, the death probability was calculated from the literature,<sup>11</sup> and for infected individuals, the combined SUS/SGSS data were used. Data gathered from SUS comprised all completed hospital spells in NHSE Trusts arising from admissions over a nine-month period from 10 March 2020 through to 31 December 2020 inclusive. We obtained age (in years) and sex of the patient, and calculated length of stay to

the nearest day using recorded admission and discharge dates. We fitted length of stay distributions for positive and negative admissions using a Weibull distribution and adjusting for age and sex. Suitable values for transmission parameters between patients and HCWs were selected to quantitatively and qualitatively reproduce data from individual Trusts in different regions of England, with differential case-loads. We parameterised vaccine effectiveness using data relating to the protection against infection by Alpha variant (as the predominate variant across the vaccine rollout period within the second wave) by Pfizer BioNTech (BNT162b2) COVID-19 vaccine (received by over 90% of vaccinated SIREN participants) which was assumed constant across the working-age range.<sup>12</sup> HCW infection data was calibrated using a meta-analysis of studies on HCW infection rates,<sup>13</sup> combined with results from the SIREN study.

### Model Calibration:

Where data were available, we assigned values to identifiable parameters from the literature (

Appendix Table A1). The unidentifiable parameters were iteratively calibrated to within acceptable ranges using the methodology described by Joslyn et al.<sup>14</sup> We derived a set of criteria against which simulations were deemed to be representative of observed data using aggregated hospital-level data on the infection rate in patients and HCWs drawn; these criteria are defined in Table 2. Initially log-10 uniform probability distributions were assumed for all transmission probabilities and parameters were allowed to take on any value from  $10^{-10}$  to 1. 1000 Latin Hypercube sampled parameter sets were generated and simulations were executed as described in “Simulations”. For the next iteration a new distribution was derived for each parameter set by identifying the highest-density regions for each parameter set in which any of the tests were satisfied. This was repeated for two further iterations until a subset of runs passed all four tests. The parameter sets that passed all four tests were then assessed qualitatively against empirical data on patient and HCW infections, so compared qualitatively to the parameter values to those in a previously published simple deterministic model of hospital transmission.<sup>15</sup>

The proportion of susceptible patients that acquired a nosocomial infection was estimated to be less than 5% based on a previous modelling study demonstrating this outcome in a high prevalence area with higher than normal transmission rates.<sup>15</sup> We used data from the SIREN study to estimate the proportion of HCWs infected over time. The range into which a result must fall to pass the test relating to each criterion is detailed in Table 2.

**Table 2: Criteria for an outcome to be defined as related to a feasible parameter set.**

| Criteria                                                                         | Min    | Max   |
|----------------------------------------------------------------------------------|--------|-------|
| 1 Maximum proportion of susceptible patients that develop a nosocomial infection | 0.0005 | 0.05  |
| 2 Proportion of HCWs infected before 10 November 2020                            | 0.202  | 0.353 |
| 3 Proportion of HCWs infected before 08 December 2020                            | 0.208  | 0.382 |
| 4 Proportion of HCWs infected between 10 November and 08 December 2020           | 0.003  | 0.021 |

Supplementary Information: Additional Tables and Figures, Additional Figure 3 shows the distribution of cumulative infection in SIREN participants by Trust at the calibration timepoints.

### Input Data:

The model relies on input data in the form of a file containing the number of cases to admit per day, this file must be named “region.csv” where region is one of those defined in Table 1. The parameters are also imported from an XML parameter file, examples of these files are contained in the Appendix below.

### Computational platform:

The model is constructed in the Java programming language using Java SE 11. The IBM is cross-platform and runs without visualisation software. Simulations were executed locally.

**Simulations:**

The model was simulated for 2550 time-steps covering a time period of 425 days (6 steps per simulated day) aligning with the collection period of the patient-level and SIREN data. Individual-level patient and HCW data on infection status and location were recorded at each time-step.

**Scaling between regional and national data:**

To scale regional data up to a national level, the regional data is weighted by the proportion of all NHS beds in a particular region.<sup>16</sup>

## References:

1. Grimm V, Berger U, DeAngelis DL, et al. The ODD protocol: A review and first update. *Ecological Modelling* 2010;221(23):2760-68. doi: doi.org/10.1016/j.ecolmodel.2010.08.019.
2. Luke S, Cioffi-Revilla C, Panait L, Sullivan K, Balan G. MASON: A multiagent simulation environment. *Simulation* 2005;81(7):517-27. doi: 10.1177/0037549705058073.
3. Hanrath AT, Payne BAI, Duncan CJA. Prior SARS-CoV-2 infection is associated with protection against symptomatic reinfection. *J Infect* 2021;82(4):e29-e30. doi: 10.1016/j.jinf.2020.12.023.
4. Hall VJ, Foulkes S, Charlett A, et al. SARS-CoV-2 infection rates of antibody-positive compared with antibody-negative health-care workers in England: a large, multicentre, prospective cohort study (SIREN). *Lancet* 2021;397(10283):1459-69. doi: 10.1016/s0140-6736(21)00675-9.
5. Office for National Statistics. National population projections: 2018-based. Office for National Statistics. <https://www.ons.gov.uk/peoplepopulationandcommunity/populationandmigration/populationprojections/bulletins/nationalpopulationprojections/2018based>.
6. Joint Committee on Vaccination and Immunisation. Joint Committee on Vaccination and Immunisation: advice on priority groups for COVID-19 vaccination, 30 December 2020. 6 January 2021. <https://www.gov.uk/government/publications/priority-groups-for-coronavirus-covid-19-vaccination-advice-from-the-jcvi-30-december-2020/joint-committee-on-vaccination-and-immunisation-advice-on-priority-groups-for-covid-19-vaccination-30-december-2020>.
7. The Kings Fund. Overview of the health and social care workforce. <https://www.kingsfund.org.uk/projects/time-think-differently/trends-workforce-overview>.
8. Birrell P, Blake J, Van Leeuwen E, Gent N, De Angelis D. Real-time nowcasting and forecasting of COVID-19 dynamics in England: the first wave. *Philos Trans R Soc Lond B Biol Sci* 2021;376(1829):20200279. doi: 10.1098/rstb.2020.0279.
9. Delignette-Muller ML, Dutang CJ. *fitdistrplus: An R package for fitting distributions*. 2015;64(4):1-34. doi: 10.18637/jss.v064.i04.
10. Bhattacharya A, Collin SM, Stimson J, et al. Healthcare-associated COVID-19 in England: a national data linkage study. *J Infect* 2021 doi: 10.1016/j.jinf.2021.08.039.
11. Cohen J, Bilsen J, Addington-Hall J, et al. Population-based study of dying in hospital in six European countries. *Palliat Med* 2008;22(6):702-10. doi: 10.1177/0269216308092285.
12. Hall VJ, Foulkes S, Saei A, et al. COVID-19 vaccine coverage in health-care workers in England and effectiveness of BNT162b2 mRNA vaccine against infection (SIREN): a prospective, multicentre, cohort study. *Lancet* 2021;397(10286):1725-35. doi: 10.1016/s0140-6736(21)00790-x.
13. Evans S, Stimson J, Pople D, et al. Quantifying the contribution of pathways of nosocomial acquisition of COVID-19 in English hospitals. *Int J Epidemiol* 2021 doi: 10.1093/ije/dyab241.
14. Joslyn LR, Kirschner DE, Linderman JJ. CaliPro: A Calibration Protocol That Utilizes Parameter Density Estimation to Explore Parameter Space and Calibrate Complex Biological Models. *Cell Mol Bioeng* 2021;14(1):31-47. doi: 10.1007/s12195-020-00650-z.
15. Evans S, Agnew E, Vynnycky E, et al. The impact of testing and infection prevention and control strategies on within-hospital transmission dynamics of COVID-19 in English hospitals. *Philos Trans R Soc Lond B Biol Sci* 2021;376(1829):20200268. doi: 10.1098/rstb.2020.0268.
16. NHS England. Bed Availability and Occupancy Data – Overnight. <https://www.england.nhs.uk/statistics/statistical-work-areas/bed-availability-and-occupancy/bed-data-overnight/>.
17. Nuffield Trust. Hospital bed occupancy. <https://www.nuffieldtrust.org.uk/resource/hospital-bed-occupancy>.



18. Woloshin S, Patel N, Kesselheim AS. False Negative Tests for SARS-CoV-2 Infection - Challenges and Implications. *N Engl J Med* 2020;383(6):e38. doi: 10.1056/NEJMp2015897.
19. University of Oxford SARS-CoV-2 test development validation cell. Preliminary report from the Joint PHE Porton Down & University of Oxford SARS-CoV-2 test development and validation cell: Rapid evaluation of Lateral Flow Viral Antigen detection devices (LFDs) for mass community testing.  
[https://www.ox.ac.uk/sites/files/oxford/media\\_wysiwyg/UK%20evaluation\\_PHE%20Porton%20Down%20%20University%20of%20Oxford\\_final.pdf](https://www.ox.ac.uk/sites/files/oxford/media_wysiwyg/UK%20evaluation_PHE%20Porton%20Down%20%20University%20of%20Oxford_final.pdf).
20. He X, Lau EH, Wu P, et al. Temporal dynamics in viral shedding and transmissibility of COVID-19. *Nature medicine* 2020;26(5):672-75. doi: 1038/s41591-020-0869-5.
21. Office for National Statistics. Population estimates for the UK, England and Wales, Scotland and Northern Ireland: mid-2018. Office for National Statistics; 27 June 2019.  
<https://www.ons.gov.uk/peoplepopulationandcommunity/populationandmigration/populationandmigration/bulletins/annualmidyearpopulationestimates/mid2018>.
22. Office for Health Improvement Disparities. AMR local indicators - OHID.  
<https://fingertips.phe.org.uk/amr-local-indicators#gid/1938132917/ati/118>.
23. Cohen B, Hyman S, Rosenberg L, Larson E. Frequency of patient contact with health care personnel and visitors: implications for infection prevention. *The Joint Commission Journal on Quality and Patient Safety* 2012;38(12):560-65. doi: 10.1016/s1553-7250(12)38073-2.
24. Public Health England. UK flu levels according to PHE statistics: 2018 to 2019.  
<https://www.gov.uk/government/news/uk-flu-levels-according-to-phe-statistics-2018-to-2019>.
25. Kluytmans-van den Bergh MFQ, Buiting AGM, Pas SD, et al. Prevalence and Clinical Presentation of Health Care Workers With Symptoms of Coronavirus Disease 2019 in 2 Dutch Hospitals During an Early Phase of the Pandemic. *Jama Netw Open* 2020(2574-3805 (Electronic)) doi: 10.1001/jamanetworkopen.2020.9673.
26. NHS England, NHS Improvement. Novel coronavirus (COVID-19) standard operating procedure NHS England and NHS Improvement rollout of lateral flow devices for asymptomatic staff testing for SARS CoV-2 (phase 2: trusts). 16 November 2020  
[https://www.england.nhs.uk/coronavirus/wp-content/uploads/sites/52/2020/11/C0873\\_i\\_SOP\\_LFD-rollout-for-asymptomatic-staff-testing\\_phase-2-trusts-v1.1\\_16-nov20.pdf](https://www.england.nhs.uk/coronavirus/wp-content/uploads/sites/52/2020/11/C0873_i_SOP_LFD-rollout-for-asymptomatic-staff-testing_phase-2-trusts-v1.1_16-nov20.pdf).
27. Jarvis C, Edmunds J, CMMID COVID-19 Working Group. Social contacts in workplace the UK from the CoMix social contact survey. 29 June 2021.  
[https://assets.publishing.service.gov.uk/government/uploads/system/uploads/attachment\\_data/file/1009160/S1311\\_Comix\\_Report\\_contacts\\_in\\_the\\_workplace\\_SAGE\\_93.pdf](https://assets.publishing.service.gov.uk/government/uploads/system/uploads/attachment_data/file/1009160/S1311_Comix_Report_contacts_in_the_workplace_SAGE_93.pdf).
28. Harris RJ, Hall JA, Zaidi A, et al. Effect of Vaccination on Household Transmission of SARS-CoV-2 in England. *N Engl J Med* 2021;385(8):759-60. doi: 10.1056/NEJMc2107717.
29. Andrews N, Tessier E, Stowe J, et al. Vaccine effectiveness and duration of protection of Comirnaty, Vaxzevria and Spikevax against mild and severe COVID-19 in the UK. *Medrxiv* 2021. doi: 10.1101/2021.09.15.21263583.
30. Volz E, Mishra S, Chand M, et al. Assessing transmissibility of SARS-CoV-2 lineage B.1.1.7 in England. *Nature* 2021;593(7858):266-69. doi: 10.1038/s41586-021-03470-x.

Appendices: Parameter Value Tables and Example Input Files:

**Appendix Table A1: Parameter values.**

| <b>General</b>                    |                                                                                                                 |             |                                             |
|-----------------------------------|-----------------------------------------------------------------------------------------------------------------|-------------|---------------------------------------------|
| <i>occupancy</i>                  | Proportion of occupied beds in trust                                                                            | 0.85        | Mean from individual trust data in SUS      |
| <i>hcws</i>                       | Number of HCWs                                                                                                  | 8000        | Mean from individual trust data             |
| <i>patients</i>                   | Number of patients initially in trust                                                                           | 860         | At 86% capacity <sup>17</sup>               |
| <i>testSens_PCR</i>               | Sensitivity of PCR test (false negative rate)                                                                   | 0.95        | Woloshin et al. <sup>18</sup>               |
| <i>testSpec_PCR</i>               | Specificity of PCR test (false positive rate)                                                                   | 0.995       | Woloshin et al. <sup>18</sup>               |
| <i>testSens_LFD</i>               | Sensitivity of LFD test (false negative rate)                                                                   | 0.78        | PHE/University of Oxford <sup>19</sup>      |
| <i>testSpec_LFD</i>               | Specificity of LFD test (false positive rate)                                                                   | 0.995       | PHE/University of Oxford <sup>19</sup>      |
| <i>incubationPeriodDays_shape</i> | Shape variable for Gamma distribution for incubation period                                                     | 13.3        | He et al. <sup>20</sup>                     |
| <i>incubationPeriodDays_rate</i>  | Rate variable for Gamma distribution for incubation period                                                      | 4.16        | He et al. <sup>20</sup>                     |
| <i>onsetPeriodDays_mean</i>       | Mean for Log-normal distribution for onset period                                                               | 1.434065    | SPI-M communication                         |
| <i>onsetPeriodDays_sd</i>         | SD for Log-normal distribution for onset period                                                                 | 0.6612      | SPI-M communication                         |
| <i>camPop</i>                     | Community population (Cambridgeshire)                                                                           | 651482      | 2018 mid-year estimate <sup>21</sup>        |
| <i>wards</i>                      | Number of wards                                                                                                 | 42          |                                             |
| <i>shared_bays</i>                | Number of bays                                                                                                  | 4           | ~80% beds are in shared rooms <sup>22</sup> |
| <i>bedsPerBay</i>                 | Number of beds in a shared room                                                                                 | 6           |                                             |
| <b>Patients</b>                   |                                                                                                                 |             |                                             |
| <i>probMale</i>                   | Probability of patients being Male                                                                              | 0.576       | SUS                                         |
| <i>ageShape</i>                   | Shape component of Gamma distribution of age distribution                                                       | 4.145       | Fit to data from SUS                        |
| <i>ageScale</i>                   | Scale component of Gamma distribution of age distribution                                                       | 75.48       | Fit to data from SUS                        |
| <i>shapeLOS_Susc</i>              | Shape parameter for LOS distribution Weibull distribution for susceptible patients                              | -0.1780082  | Fit to data from SUS                        |
| <i>scaleLOS_Susc_int</i>          | Intercept for scale parameter for LOS distribution Weibull distribution for susceptible patients                | 2.331949    | Fit to data from SUS                        |
| <i>scaleLOS_Susc_age</i>          | Age component of scale parameter for LOS distribution Weibull distribution for susceptible patients             | -0.00546131 | Fit to data from SUS                        |
| <i>scaleLOS_Susc_female</i>       | Female gender component of scale parameter for LOS distribution Weibull distribution for susceptible patients   | -1.242609   | Fit to data from SUS                        |
| <i>scaleLOS_Susc_age_female</i>   | Interaction of age and female gender component of scale parameter for LOS distribution Weibull distribution for | 0.01424664  | Fit to data from SUS                        |

|                                |                                                                                                                                      |             |                                             |
|--------------------------------|--------------------------------------------------------------------------------------------------------------------------------------|-------------|---------------------------------------------|
|                                | susceptible patients                                                                                                                 |             |                                             |
| <i>shapeLOS_Inf</i>            | Shape parameter for LOS distribution Weibull distribution for symptomatically infected patients                                      | 0.07853536  | Fit to data from SUS                        |
| <i>scaleLOS_Inf_int</i>        | Intercept for scale parameter for LOS distribution Weibull distribution for symptomatically infected patients                        | 2.595361    | Fit to data from SUS                        |
| <i>scaleLOS_Inf_age</i>        | Age component of scale parameter for LOS distribution Weibull distribution for susceptible patients                                  | 0.002301093 | Fit to data from SUS                        |
| <i>scaleLOS_Inf_female</i>     | Female gender component of scale parameter for LOS distribution Weibull distribution for susceptible patients                        | -0.5465226  | Fit to data from SUS                        |
| <i>scaleLOS_Inf_age_female</i> | Interaction of age and female gender component of scale parameter for LOS distribution Weibull distribution for susceptible patients | 0.006978023 | Fit to data from SUS                        |
| <i>patientAsymProb</i>         | Probability a patient infection is asymptomatic                                                                                      | 0.4         | SUS                                         |
| <i>bP2P</i>                    | Transmission rate to other patients                                                                                                  |             | Calibrated                                  |
| <i>bH2P</i>                    | Transmission rate from HCW to patients                                                                                               |             | Calibrated                                  |
| <i>bP2P_hosp</i>               | Indirect transmission rate from patients to other patients                                                                           |             | Calibrated                                  |
| <i>recoveryRatePat_Shape</i>   | Shape parameter of Gamma distribution of recovery distribution per day.                                                              | 1.43        | Fit to data from SUS                        |
| <i>recoveryRatePat_Rate</i>    | Rate parameter of Gamma distribution of recovery distribution per day.                                                               | 0.542       | Fit to data from SUS                        |
| <i>deathOnDisch_Inf_Int</i>    | Intercept of linear model for probability of death on discharge for infected patients                                                | -0.00043572 | Fit to data from SUS                        |
| <i>deathOnDisch_Inf_X</i>      | X component of linear model for probability of death on discharge for infected patients                                              | -0.00159802 | Fit to data from SUS                        |
| <i>deathOnDisch_Inf_X2</i>     | X <sup>2</sup> component of linear model for probability of death on discharge for infected patients                                 | 7.30529E-05 | Fit to data from SUS                        |
| <i>deathOnDisch_Susc_Int</i>   | Intercept of linear model for probability of death on discharge for non-symptomatic/uninfected patients                              | -7.96613    | Fit to data from Cohen et al. <sup>11</sup> |
| <i>deathOnDisch_Susc_X</i>     | X component of linear model for probability of death on discharge for non-symptomatic/uninfected patients                            | 0.00102     | Fit to data from Cohen et al. <sup>11</sup> |
| <i>deathOnDisch_Susc_X2</i>    | X <sup>2</sup> component of linear model for probability of death on discharge for non-symptomatic/uninfected patients               | 0.000896    | Fit to data from Cohen et al. <sup>11</sup> |
| <i>testOnAdmProb_Inf</i>       | Probability a symptomatically infected patient will be tested on                                                                     | 0.95        | Estimated from individual NHSE trust        |

|                                |                                                                                                                                              |             |                                                                                  |
|--------------------------------|----------------------------------------------------------------------------------------------------------------------------------------------|-------------|----------------------------------------------------------------------------------|
|                                | admission                                                                                                                                    |             | data                                                                             |
| <i>testOnAdmProb_Other</i>     | Probability non-infected patient will be tested at random on admission                                                                       | 0.05        | Estimated from individual NHSE trust data                                        |
| <i>testInHospProb</i>          | Probability a symptomatically infected patient nosocomially will be tested per time-step                                                     | 0.1         | Assumption that all patients will be tested within 2 days of developing symptoms |
| <i>testPeriodSteps</i>         | Time-steps from test to result                                                                                                               | 8           | Estimated from individual NHSE trust data                                        |
| <i>readmitProb</i>             | Probability a patient that develops symptoms after discharge will be readmitted within 14 days                                               | 0.2         | Estimated from individual NHSE trust data                                        |
| <i>expOnAdmissionProb</i>      | Probability a susceptible patient will be exposed on admission (to be multiplied by the number of cases admitted that are known symptomatic) | 0.002631579 |                                                                                  |
| <i>retestProb_per_step</i>     | Probability a patient will be retested after day 5 (per step)                                                                                | 0           | No retesting in this analysis                                                    |
| <i>hcw_to_patient_contacts</i> | Number of unique patients seen by a HCW every day (used to calculate exposure risk to COVID+ patients)                                       | 20          | Cohen et al. <sup>23</sup>                                                       |
| <i>non_covid_symp_prob</i>     | Probability a non-infected patient will have COVID-19-like symptoms on admission                                                             | 0.1         | Assumption based on ILI proportions in a normal year <sup>24</sup>               |
| <b>HCWs</b>                    |                                                                                                                                              |             |                                                                                  |
| <i>shiftLengthHrs</i>          | Length of shift in hours (this is converted to time-steps within the model code)                                                             | 12          | Assumption                                                                       |
| <i>hcwAsymProb</i>             | Probability a HCW that becomes infected is asymptomatic                                                                                      | 0.4         | Assumption                                                                       |
| <i>bP2H</i>                    | Transmission probability from patients to HCWs per time-step                                                                                 | 0.0000025   | Calibrated                                                                       |
| <i>bH2H</i>                    | Transmission probability from HCWs to other HCWs per time-step                                                                               | 0.0000001   | Calibrated                                                                       |
| <i>absentThroughSick_self</i>  | Probability a HCW will self-isolate per time-step                                                                                            | 0.01        | 34% over total infected time <sup>25</sup>                                       |
| <i>testProbHCWDays</i>         | Periodicity of HCW LFD testing (days)                                                                                                        | 3.5         | NHSE LFD protocol <sup>26</sup>                                                  |
| <i>lfd_test_compliance</i>     | Proportion of HCWs adhering to LFD testing regime                                                                                            | 0.7         | Expert opinion                                                                   |
| <i>absentDays</i>              | Number of days to be off work following a positive test                                                                                      | 7           |                                                                                  |
| <i>beginTestingDay</i>         | Day that LFD testing of HCW began                                                                                                            | 253         |                                                                                  |
| <i>commScale</i>               | Scale of community acquisition rate for HCWs                                                                                                 | 0.052       | CoMIX <sup>27</sup>                                                              |
| <i>patient_to_hcw_contacts</i> | Number of HCWs seen by a patient per day (for scaling transmission risk)                                                                     | 18          | Cohen et al. <sup>23</sup>                                                       |

|                                  |                                                                                               |      |                                                            |
|----------------------------------|-----------------------------------------------------------------------------------------------|------|------------------------------------------------------------|
| <i>prob_ward_based</i>           | Probability a HCW is based on a ward instead of moving around the hospital                    | 0.25 | Estimate from proportion of nursing staff out of all staff |
| <i>days_to_vaccine_efficacy</i>  | Day after vaccination that protection begins                                                  | 21   |                                                            |
| <i>hcw_vaccination_start_day</i> | Day that vaccination program in HCWs commences                                                | 281  | 8 December 2021                                            |
| <b>Comm</b>                      |                                                                                               |      |                                                            |
| <i>careHomeProb</i>              | Probability a patient is from a care home                                                     | 0.02 | Health foundation communication                            |
| <i>caseScale</i>                 | Scaling factor for admissions rate                                                            | 1    |                                                            |
| <i>vacc_scale_from</i>           | Scaling factor for transmissibility from vaccinated individual                                | 0.5  | Harris et al. <sup>28</sup>                                |
| <i>vacc_scale_to1</i>            | Scaling factor for transmissibility to individual vaccinated with one dose (trans = 1-value)  | 0.7  | Hall et al. <sup>12</sup>                                  |
| <i>vacc_scale_to2</i>            | Scaling factor for transmissibility to individual vaccinated with two doses (trans = 1-value) | 0.7  | Andrews et al. <sup>29</sup>                               |
| <i>var_scale_alpha</i>           | Scaling factor of beta parameter for Alpha variant                                            | 1.56 |                                                            |

**Appendix Table A2: Logistic distribution coefficients for Alpha variant proportion.**

Fit to period 1<sup>st</sup> October – 22<sup>nd</sup> January inclusive (day 0 = 1 March 2020)  
 Fitted function :  $y = A/(1 + \exp(-k(t - \mu)))$   
 t = day number, y = coverage proportion

| NHSE Region              | Fitted coefficients |        |        | Observed data             |
|--------------------------|---------------------|--------|--------|---------------------------|
|                          | A                   | k      | $\mu$  | Source                    |
| London                   | 0.977               | .0999  | 63.525 | Volz et al. <sup>30</sup> |
| Midlands                 | 0.907               | 0.1213 | 83.510 |                           |
| North East and Yorkshire | 0.842               | 0.1221 | 88.627 |                           |
| North West               | 0.911               | 0.1071 | 89.180 |                           |
| South East               | 0.915               | 0.0983 | 52.360 |                           |
| South West               | 0.957               | 0.0871 | 81.662 |                           |
| East of England          | 0.951               | 0.1019 | 65.037 |                           |

Fitted using R package 'drc'

**Appendix Table A3: Logistic distribution coefficients for vaccine cover proportion (1+ doses).**

Fit to period 7<sup>th</sup> December – 9<sup>th</sup> April inclusive, assuming day 0 (7<sup>th</sup> December) has 0% coverage  
 Fitted function :  $y = A/(1 + \exp(-k(t - \mu)))$   
 t = day number, y = coverage proportion

|            |         | Fitted coefficients |             |             | Observed data          |
|------------|---------|---------------------|-------------|-------------|------------------------|
|            |         | A                   | k           | $\mu$       | Source                 |
| HCW        | England | 0.931251619         | 0.116446417 | 31.90180448 | SIREN-NIMS             |
| Population | 16-49   | 0.361368            | 0.0439      | 92.47233    | NIMS, ONS <sup>5</sup> |
|            | 50-54   | 1.643953            | 0.049632    | 114.9436    |                        |
|            | 55-59   | 1.257394            | 0.058007    | 99.44187    |                        |
|            | 60-64   | 1.011423            | 0.089646    | 82.83167    |                        |
|            | 65-69   | 1.011423            | 0.089646    | 82.83167    |                        |
|            | 70-74   | 0.954113            | 0.227902    | 57.10629    |                        |
|            | 75-79   | 0.979244            | 0.204977    | 48.48741    |                        |
|            | 80plus  | 0.955866            | 0.109699    | 35.95469    |                        |

**Input File Example 1: XML parameter file.**

```
<?xml version="1.0" encoding="UTF-8" standalone="no"?>
<input>
  <General>
    <occupancy>0.85</occupancy>
    <doctors>1600</doctors>
    <nurses>6400</nurses>
    <hcws>8000</hcws>
    <patients>200</patients>
    <recruitPatInt>-5.062</recruitPatInt>
    <recruitPatX> 1.478</recruitPatX>
    <recruitPatX2>-0.03795</recruitPatX2>
    <recruitPatX3>0.0002646</recruitPatX3>
    <testSens>0.95</testSens>
    <testSpec>0.95</testSpec>
    <incubationPeriodDays_shape>13.3</incubationPeriodDays_shape>
    <incubationPeriodDays_rate>4.16</incubationPeriodDays_rate>
    <onsetPeriodDays_mean>1.434065</onsetPeriodDays_mean>
    <onsetPeriodDays_sd>0.6612</onsetPeriodDays_sd>
    <camPop>651482</camPop>
    <recScale>0.430980337293819</recScale>
    <asymptCommScale>233.039498227648</asymptCommScale>
```

```
<wards>42</wards>
<single_bays>0</single_bays>
<shared_bays>4</shared_bays>
<bedsPerBay>6</bedsPerBay>
</General>
<Patients>
  <probMale>0.576</probMale>
  <ageShape>4.145</ageShape>
  <ageScale>75.48</ageScale>
  <shapeLOS_Susc>-0.17800824</shapeLOS_Susc>
  <scaleLOS_Susc_int>2.33194900</scaleLOS_Susc_int>
  <scaleLOS_Susc_age>-0.00546131</scaleLOS_Susc_age>
  <scaleLOS_Susc_female>-1.24260868</scaleLOS_Susc_female>
  <scaleLOS_Susc_age_female>0.01424664</scaleLOS_Susc_age_female>
  <shapeLOS_Inf>0.078535365</shapeLOS_Inf>
  <scaleLOS_Inf_int>2.595360634</scaleLOS_Inf_int>
  <scaleLOS_Inf_age>0.002301093</scaleLOS_Inf_age>
  <scaleLOS_Inf_female>-0.546522561</scaleLOS_Inf_female>
  <scaleLOS_Inf_age_female>0.006978023</scaleLOS_Inf_age_female>
  <patientAsymProb>0.4</patientAsymProb>
  <bP2P>0.0022</bP2P>
  <bP2P_hosp>0.000015</bP2P_hosp>
  <bH2P>5.00E-04</bH2P>
  <recoveryRatePat_Shape>1.43</recoveryRatePat_Shape>
  <recoveryRatePat_Rate>0.542</recoveryRatePat_Rate>
  <deathOnDisch_Inf_Int>-0.0004357198</deathOnDisch_Inf_Int>
  <deathOnDisch_Inf_X>-0.0015980156</deathOnDisch_Inf_X>
  <deathOnDisch_Inf_X2>0.0000730529</deathOnDisch_Inf_X2>
  <deathOnDisch_Susc_Int>-7.96613</deathOnDisch_Susc_Int>
  <deathOnDisch_Susc_X>0.00102</deathOnDisch_Susc_X>
  <deathOnDisch_Susc_X2>0.000896</deathOnDisch_Susc_X2>
  <testOnAdmProb_Inf>1</testOnAdmProb_Inf>
  <testOnAdmProb_Other>1</testOnAdmProb_Other>
  <testInHospProb>0.2</testInHospProb>
  <testPeriodSteps>8</testPeriodSteps>
  <readmitProb>0.2</readmitProb>
  <expOnAdmissionProb>0.002631579</expOnAdmissionProb>
  <testPosScale>0.0</testPosScale>
  <testNegScale>1.0</testNegScale>
  <suspectedScale>1.0</suspectedScale>
  <retestProb_per_step>0.0</retestProb_per_step>
  <dayToRetest>10000</dayToRetest>
  <non_covid_symp_prob>0.1</non_covid_symp_prob>
  <hcw_to_patient_contacts>20</hcw_to_patient_contacts>
</Patients>
<HCWs>
  <shiftLengthHrs>12</shiftLengthHrs>
  <hcwAsymProb>0.4</hcwAsymProb>
  <bP2H>2.5E-04</bP2H>
  <bH2H>1.5E-04</bH2H>
  <absentThroughSick_self>0.1</absentThroughSick_self>
  <absentThroughSick_random>0.005</absentThroughSick_random>
  <testProbHCWDays>5000</testProbHCWDays>
  <absentDays>10</absentDays>
  <beginTestingDay>1</beginTestingDay>
  <commScale>0.2</commScale>
  <patient_to_hcw_contacts>18</patient_to_hcw_contacts>
  <prob_ward_based>0.25</prob_ward_based>
  <hcw_vaccination_start_day>281</hcw_vaccination_start_day>
  <days_to_vaccine_efficacy>21</days_to_vaccine_efficacy>
  <hcw_vaccine_eq_A>0.93</hcw_vaccine_eq_A>
```

```
<hcw_vaccine_eq_k>0.116446417</hcw_vaccine_eq_k>
<hcw_vaccine_eq_mu>31.90180448</hcw_vaccine_eq_mu>
<vaccine_efficacy_one_dose>0.76</vaccine_efficacy_one_dose>
</HCWs>
<Comm>
  <commProbInt>-0.00000469835</commProbInt>
  <commProbX> 0.000001895326</commProbX>
  <commProbX2>-0.00000002551533</commProbX2>
  <minCommProb>0.0000015</minCommProb>
  <symptomToHospDays>0</symptomToHospDays>
  <careHomeProb>0.1</careHomeProb>
  <caseScale>1</caseScale>
  <visitorsPerStep>0</visitorsPerStep>
  <extraLOS>1.42</extraLOS>
    <prop_117_eq_A>1.0</prop_117_eq_A>
    <prop_117_eq_k>0.63</prop_117_eq_k>
    <prop_117_eq_mu>57.4</prop_117_eq_mu>
    <vacc_scale_from>0.5</vacc_scale_from>
    <var_scale_from>1.57</var_scale_from>
    <comm_vac_16_to_49_A>0.361</comm_vac_16_to_49_A>
    <comm_vac_50_to_54_A>1.643</comm_vac_50_to_54_A>
    <comm_vac_55_to_59_A>1.257</comm_vac_55_to_59_A>
    <comm_vac_60_to_64_A>1.011</comm_vac_60_to_64_A>
    <comm_vac_65_to_69_A>0.928</comm_vac_65_to_69_A>
    <comm_vac_70_to_74_A>0.954</comm_vac_70_to_74_A>
    <comm_vac_75_to_79_A>0.979</comm_vac_75_to_79_A>
    <comm_vac_80_plus_A>0.955</comm_vac_80_plus_A>
    <comm_vac_16_to_49_k>0.043</comm_vac_16_to_49_k>
    <comm_vac_50_to_54_k>0.049</comm_vac_50_to_54_k>
    <comm_vac_55_to_59_k>0.058</comm_vac_55_to_59_k>
    <comm_vac_60_to_64_k>0.089</comm_vac_60_to_64_k>
    <comm_vac_65_to_69_k>0.181</comm_vac_65_to_69_k>
    <comm_vac_70_to_74_k>0.227</comm_vac_70_to_74_k>
    <comm_vac_75_to_79_k>0.204</comm_vac_75_to_79_k>
    <comm_vac_80_plus_k>0.109</comm_vac_80_plus_k>
    <comm_vac_16_to_49_mu>92.472</comm_vac_16_to_49_mu>
    <comm_vac_50_to_54_mu>114.943</comm_vac_50_to_54_mu>
    <comm_vac_55_to_59_mu>99.441</comm_vac_55_to_59_mu>
    <comm_vac_60_to_64_mu>82.831</comm_vac_60_to_64_mu>
    <comm_vac_65_to_69_mu>68.039</comm_vac_65_to_69_mu>
    <comm_vac_70_to_74_mu>57.106</comm_vac_70_to_74_mu>
    <comm_vac_75_to_79_mu>48.487</comm_vac_75_to_79_mu>
    <comm_vac_80_plus_mu>35.954</comm_vac_80_plus_mu>
  </Comm>
</input>
```



**Input File Example 2: Admissions File.**

| X  | y        | region          |
|----|----------|-----------------|
| 0  | 0        | East Of England |
| 1  | 0        | East Of England |
| 2  | 0        | East Of England |
| 3  | 0        | East Of England |
| 4  | 0        | East Of England |
| 5  | 0        | East Of England |
| 6  | 0        | East Of England |
| 7  | 0        | East Of England |
| 8  | 0        | East Of England |
| 9  | 0        | East Of England |
| 10 | 0.000336 | East Of England |
| 11 | 0.001532 | East Of England |
| 12 | 0.002727 | East Of England |
| 13 | 0.003923 | East Of England |
| 14 | 0.005119 | East Of England |
| 15 | 0.006315 | East Of England |
| 16 | 0.007508 | East Of England |
| 17 | 0.008691 | East Of England |
| 18 | 0.009854 | East Of England |
| 19 | 0.010982 | East Of England |
| 20 | 0.012061 | East Of England |
