# Supplementary material for: Burden of SARS-CoV-2 infection in healthcare workers during second wave in England and impact of vaccines: prospective multicentre cohort study (SIREN) and mathematical model
Source: PubMed Central journal article supplement (PMC9295077; doi:10.1136/bmj-2022-070379), 2022-07-20
Supplement: popd070379.ww3.pdf [file popd070379.ww3.pdf]

### **Appendix 3: SIREN Study Group Members.**

SIREN Study Group (UKHSA team and Devolved Administrations), SIREN associated studies and participating SIREN site members:

| <b>No.</b> | <b>SIREN Study Group</b>                               | <b>First name</b> | <b>Surname</b>   |
|------------|--------------------------------------------------------|-------------------|------------------|
| 1.         | UK Health Security Agency                              | Ana               | Atti             |
| 2.         | UK Health Security Agency                              | Omoyeni           | Adebiyi          |
| 3.         | UK Health Security Agency                              | Nick              | Andrews          |
| 4.         | UK Health Security Agency                              | Tim               | Brooks           |
| 5.         | UK Health Security Agency                              | Colin             | Brown            |
| 6.         | UK Health Security Agency                              | Davina            | Calbraith        |
| 7.         | UK Health Security Agency                              | Meera             | Chand            |
| 8.         | UK Health Security Agency                              | Andre             | Charlett         |
| 9.         | UK Health Security Agency                              | Michelle          | Cole             |
| 10.        | UK Health Security Agency                              | Joanna            | Conneely         |
| 11.        | UK Health Security Agency                              | Paul              | Conneely         |
| 12.        | UK Health Security Agency                              | Silvia            | D’Arcangelo      |
| 13.        | UK Health Security Agency                              | Sarah             | Foulkes          |
| 14.        | UK Health Security Agency                              | Nabila            | Fowles-Gutierrez |
| 15.        | UK Health Security Agency                              | Eileen            | Gallagher        |
| 16.        | UK Health Security Agency                              | Victoria          | Hall             |
| 17.        | UK Health Security Agency                              | Nipunadi          | Hettiarachchi    |
| 18.        | UK Health Security Agency                              | Jacqueline        | Hewson           |
| 19.        | UK Health Security Agency                              | Susan             | Hopkins          |
| 20.        | UK Health Security Agency                              | Kate              | Howell           |
| 21.        | UK Health Security Agency                              | Ferdinando        | Insalata         |
| 22.        | UK Health Security Agency                              | Jasmin            | Islam            |
| 23.        | UK Health Security Agency                              | Jameel            | Khawam           |
| 24.        | UK Health Security Agency                              | Robert            | Kyffin           |
| 25.        | UK Health Security Agency                              | Ezra              | Linley           |
| 26.        | UK Health Security Agency                              | Iain              | Milligan         |
| 27.        | UK Health Security Agency                              | Edward            | Monk             |
| 28.        | UK Health Security Agency                              | Katie             | Munro            |
| 29.        | UK Health Security Agency                              | Claire            | Neill            |
| 30.        | UK Health Security Agency                              | Anne-Marie        | O’Connell        |
| 31.        | UK Health Security Agency                              | Ashley            | Otter            |
| 32.        | UK Health Security Agency                              | Mary              | Ramsay           |
| 33.        | UK Health Security Agency                              | Cathy             | Rowe             |
| 34.        | UK Health Security Agency                              | Ayoub             | Saei             |
| 35.        | UK Health Security Agency                              | Noshin            | Sajedi           |
| 36.        | UK Health Security Agency                              | Amanda            | Semper           |
| 37.        | UK Health Security Agency                              | Andrew            | Taylor-Kerr      |
| 38.        | UK Health Security Agency                              | Jean              | Timeyin          |
| 39.        | UK Health Security Agency                              | Simon             | Tonge            |
| 40.        | UK Health Security Agency                              | Caio              | Tranquillini     |
| 41.        | UK Health Security Agency                              | Edgar             | Wellington       |
| 42.        | UK Health Security Agency                              | Maria             | Zambon           |
| 43.        | Public Health Agency Northern Ireland                  | Dianne            | Corrigan         |
| 44.        | Public Health Agency Northern Ireland                  | Lisa              | Cromey           |
| 45.        | Glasgow Caledonian University & Public Health Scotland | Lesley            | Price            |
| 46.        | Public Health Scotland                                 | Josie             | Long             |
| 47.        | Glasgow Caledonian University & Public Health Scotland | Nicola            | Sergenson        |

| 48.        | Public Health Scotland                                                 | Jennifer          | Bishop            |
|------------|------------------------------------------------------------------------|-------------------|-------------------|
| 49.        | Public Health Scotland                                                 | Jennifer          | Weir              |
| 50.        | Glasgow Caledonian University                                          | Ayo               | Matuluko          |
| 51.        | Glasgow Caledonian University                                          | Annelysse         | Jorgenson         |
| 52.        | Public Health Scotland                                                 | Laura             | Dobbie            |
| 53.        | Public Health Scotland                                                 | Andrew            | Telfer            |
| 54.        | Public Health Scotland                                                 | David             | Goldberg          |
| 55.        | Public Health Wales                                                    | Ellen             | de Lacy           |
| 56.        | Public Health Wales                                                    | Guy               | Stevens           |
| 57.        | Public Health Wales                                                    | Susannah          | Froude            |
| 58.        | Public Health Wales                                                    | Linda             | Tyson             |
| 59.        | Health and Care Research Wales                                         | Yvette            | Ellis             |
| 60.        | Health and Care Research Wales                                         | Chris             | Norman            |
| <b>No.</b> | <b>SIREN Associated Studies</b>                                        | <b>First name</b> | <b>Surname</b>    |
| 1.         | Protective Immunity from T cells to Covid-19 in Health workers (PITCH) | Susanna           | Dunachie          |
| 2.         | Protective Immunity from T cells to Covid-19 in Health workers (PITCH) | Paul              | Klenerman         |
| 3.         | Protective Immunity from T cells to Covid-19 in Health workers (PITCH) | Chris             | Duncan            |
| 4.         | Protective Immunity from T cells to Covid-19 in Health workers (PITCH) | Lance             | Turtle            |
| 5.         | Protective Immunity from T cells to Covid-19 in Health workers (PITCH) | Alex              | Richter           |
| 6.         | Protective Immunity from T cells to Covid-19 in Health workers (PITCH) | Thushan           | de Silva          |
| 7.         | Protective Immunity from T cells to Covid-19 in Health workers (PITCH) | Eleanor           | Barnes            |
| 8.         | Protective Immunity from T cells to Covid-19 in Health workers (PITCH) | Daniel            | Wootton           |
| 9.         | The Humoral Immune Correlates for COVID-19 (HICC) consortium           | Jonathan          | Heeney            |
| 10.        | The Humoral Immune Correlates for COVID-19 (HICC) consortium           | Helen             | Baxendale         |
| 11.        | The Humoral Immune Correlates for COVID-19 (HICC) consortium           | Javier            | Castillo-Olivares |
| 12.        | The Francis Crick Institute                                            | Rupert            | Beale             |
| 13.        | The Francis Crick Institute                                            | Edward            | Carr              |
| 14.        | Genotype2Phenotype (G2P)                                               | Wendy             | Barclay           |
| 15.        | Genotype2Phenotype (G2P)                                               | Massimo           | Palmarini         |
| 16.        | GenOMICC                                                               | John Kenneth      | Baillie           |
| <b>No.</b> | <b>Participating SIREN Sites</b>                                       | <b>First name</b> | <b>Surname</b>    |
| 1.         | ALDER HEY CHILDREN'S NHS FOUNDATION TRUST                              | B.                | Larru             |
|            |                                                                        | S.                | Mcwilliam         |
| 2.         | ANEURIN BEVAN UNIVERSITY LHB                                           | Anna              | Roynon            |
|            |                                                                        | Maxine            | Nash              |
| 3.         | ASHFORD AND ST PETER'S HOSPITALS NHS FOUNDATION TRUST                  | Stephen           | Winchester        |
|            |                                                                        | Talat             | Akhtar            |
| 4.         | BASILDON AND THURROCK UNIVERSITY HOSPITALS NHS FOUNDATION TRUST        | Stacey            | Pepper            |
|            |                                                                        | Georgina          | Butt              |
| 5.         | BEDFORDSHIRE HOSPITALS NHS FOUNDATION TRUST                            | Simantee          | Guha              |
|            |                                                                        | Philippa          | Bakker            |
| 6.         | BELFAST HEALTH AND SOCIAL CARE TRUST                                   | Clodagh           | Loughrey          |
|            |                                                                        | A.                | Watt              |

|     |                                                                 |           |                |
|-----|-----------------------------------------------------------------|-----------|----------------|
| 7.  | BETSI CADWALADR UNIVERSITY LHB                                  | Julia     | Roberts        |
|     |                                                                 | Caroline  | Mulvaney Jones |
| 8.  | BIRMINGHAM AND SOLIHULL MENTAL HEALTH NHS FOUNDATION TRUST      | Manny     | Bagary         |
|     |                                                                 | Siobhan   | Keogh          |
| 9.  | BIRMINGHAM COMMUNITY HEALTHCARE NHS FOUNDATION TRUST            | Claire    | Williams       |
|     |                                                                 | April     | Hawkins        |
| 10. | BLACK COUNTRY HEALTHCARE NHS FOUNDATION TRUST                   | Alison    | Grant          |
|     |                                                                 | Rebecca   | Temple-Purcell |
| 11. | BLACKPOOL TEACHING HOSPITALS NHS FOUNDATION TRUST               | Joanne    | Howard         |
|     |                                                                 | Emma      | Ward           |
| 12. | BOLTON NHS FOUNDATION TRUST                                     | Scott     | Latham         |
|     |                                                                 | Raksha    | Mistry         |
| 13. | BRIGHTON AND SUSSEX UNIVERSITY HOSPITALS NHS TRUST              | Lisa      | Barbour        |
|     |                                                                 | Helena    | Sovriarova     |
| 14. | BUCKINGHAMSHIRE HEALTHCARE NHS TRUST                            | R.        | Penn           |
|     |                                                                 | N.        | Wong           |
| 15. | CALDERDALE AND HUDDERSFIELD NHS FOUNDATION TRUST                | G.        | Boyd           |
|     |                                                                 | A.        | Rajgopal       |
| 16. | CENTRAL AND NORTH WEST LONDON NHS FOUNDATION TRUST              | Alejandro | Arenas-Pinto   |
|     |                                                                 | Abigail   | Severn         |
| 17. | CHESTERFIELD ROYAL HOSPITAL NHS FOUNDATION TRUST                | Edward    | Harris         |
|     |                                                                 | Amanda    | Whileman       |
| 18. | CORNWALL PARTNERSHIP NHS FOUNDATION TRUST                       | Richard   | Laugharne      |
|     |                                                                 | Susan     | Greenwood      |
| 19. | COUNTESS OF CHESTER HOSPITAL NHS FOUNDATION TRUST               | T.        | Barnes         |
|     |                                                                 | C.        | Jones          |
| 20. | CROYDON HEALTH SERVICES NHS TRUST                               | Banerjee  | SubhroOsuji    |
|     |                                                                 | Anna      | Rokakis        |
| 21. | CWM TAF MORGANNWG UNIVERSITY LHB                                | John      | Geen           |
|     |                                                                 | Carla     | Pothecary      |
| 22. | DARTFORD AND GRAVESHAM NHS TRUST                                | Tracy     | Edmunds        |
|     |                                                                 | Nihil     | Chitalia       |
| 23. | DERBYSHIRE COMMUNITY HEALTH SERVICES NHS FOUNDATION TRUST       | Kim       | Gray           |
|     |                                                                 | Eve       | Etell Kirby    |
| 24. | DERBYSHIRE HEALTHCARE NHS FOUNDATION TRUST                      | S.        | Akhtar         |
|     |                                                                 | G.        | Harrison       |
| 25. | DEVON PARTNERSHIP NHS TRUST                                     | Clare     | McAdam         |
|     |                                                                 | Stacey    | Horne          |
| 26. | DONCASTER AND BASSETLAW TEACHING HOSPITALS NHS FOUNDATION TRUST | K.        | Agwuh          |
|     |                                                                 | V.        | Maxwell        |
| 27. | DORSET COUNTY HOSPITAL NHS FOUNDATION TRUST                     | Jennifer  | Graves         |
| 28. | DORSET HEALTHCARE UNIVERSITY NHS FOUNDATION TRUST               | James     | Colton         |
|     |                                                                 | Stephanie | Willshaw       |
| 29. | EAST SUFFOLK AND NORTH ESSEX NHS FOUNDATION TRUST               | A.        | O'Kelly        |
|     |                                                                 | P.        | Ridley         |
| 30. | EAST SUSSEX HEALTHCARE NHS TRUST                                | Anna      | Cowley         |
|     |                                                                 | Janet     | Sinclair       |
| 31. | EPSOM AND ST HELIER UNIVERSITY HOSPITALS NHS TRUST              | Helen     | Johnstone      |
|     |                                                                 | Neringa   | Vilimiene      |
| 32. | FRIMLEY HEALTH NHS FOUNDATION TRUST                             | Manjula   | Meda           |
|     |                                                                 | Jane      | Democratis     |
| 33. | GEORGE ELIOT HOSPITAL NHS TRUST                                 | Simon     | Brake          |
|     |                                                                 | David     | Boss           |
| 34. | GLOUCESTERSHIRE HOSPITALS NHS FOUNDATION TRUST                  | Christine | Ford           |
|     |                                                                 | Steve     | Hams           |
| 35. | GOLDEN JUBILEE NATIONAL HOSPITAL                                | Catherine | Sinclair       |
|     |                                                                 | Val       | Irvine         |

|     |                                                       |             |                |
|-----|-------------------------------------------------------|-------------|----------------|
| 36. | GREAT WESTERN HOSPITALS NHS FOUNDATION TRUST          | Eva         | Fraille        |
|     |                                                       | Badrinathan | Chandrasekaran |
| 37. | HAMPSHIRE HOSPITALS NHS FOUNDATION TRUST              | Claire      | Thomas         |
|     |                                                       | Ina         | Hoad           |
| 38. | HOUNSLOW AND RICHMOND COMMUNITY HEALTHCARE NHS TRUST  | Shekoo      | Mackay         |
|     |                                                       | Shivani     | Khan           |
| 39. | HULL UNIVERSITY TEACHING HOSPITALS NHS TRUST          | Philippa    | Burns          |
|     |                                                       | Nicholas    | Easom          |
| 40. | HYWEL DDA UNIVERSITY LHB                              | Tracy       | Lewis          |
|     |                                                       | Zohra       | Omar           |
| 41. | IMPERIAL COLLEGE HEALTHCARE NHS TRUST                 | Graham      | Pickard        |
|     |                                                       | Kenisha     | Lewis          |
| 42. | ISLE OF WIGHT NHS TRUST                               | Sarah       | Hinch          |
|     |                                                       | Alison      | Brown          |
| 43. | JAMES PAGET UNIVERSITY HOSPITALS NHS FOUNDATION TRUST | Ben         | Burton         |
|     |                                                       | Christian   | Hacon          |
| 44. | KING'S COLLEGE HOSPITAL NHS FOUNDATION TRUST          | Ray         | Chaudhuri      |
|     |                                                       | Jonnie      | Aeron-Thomas   |
| 45. | LANCASHIRE & SOUTH CUMBRIA NHS FOUNDATION TRUST       | Robert      | Shorten        |
|     |                                                       | Kathryn     | Hollinshead    |
| 46. | LANCASHIRE TEACHING HOSPITALS NHS FOUNDATION TRUST    | Claire      | Corless        |
|     |                                                       | Robert      | Shorten        |
| 47. | LEEDS TEACHING HOSPITALS NHS TRUST                    | Kyra        | Holliday       |
|     |                                                       | Clair       | Favager        |
| 48. | LEICESTERSHIRE PARTNERSHIP NHS TRUST                  | Sarah       | Baillon        |
|     |                                                       | Joanne      | Edgar          |
| 49. | LEWISHAM AND GREENWICH NHS TRUST                      | A.          | Shah           |
|     |                                                       | J.          | Russell        |
| 50. | LINCOLNSHIRE PARTNERSHIP NHS FOUNDATION TRUST         | Kelly       | Moran          |
|     |                                                       | Ananta      | Dave           |
| 51. | LIVERPOOL UNIVERSITY HOSPITALS NHS FOUNDATION TRUST   | Anu         | Chawla         |
|     |                                                       | Fran        | Westwell       |
| 52. | LONDON NORTH WEST UNIVERSITY HEALTHCARE NHS TRUST     | Ekaterina   | Watson         |
|     |                                                       | David       | Adeboyeke      |
| 53. | MAIDSTONE AND TUNBRIDGE WELLS NHS TRUST               | C.          | Pegg           |
|     |                                                       | M.          | Williams       |
| 54. | MANCHESTER UNIVERSITY NHS FOUNDATION TRUST            | S.          | Ahmad          |
|     |                                                       | A.          | Horsley        |
| 55. | MID CHESHIRE HOSPITALS NHS FOUNDATION TRUST           | Murray      | Luckas         |
|     |                                                       | Diego       | Maseda         |
| 56. | MID ESSEX HOSPITAL SERVICES NHS TRUST                 | Lauren      | Sach           |
|     |                                                       | Yvonne      | Lester         |
| 57. | MID YORKSHIRE HOSPITALS NHS TRUST                     | Ismaelette  | Del Rosario    |
|     |                                                       | John        | Ashcroft       |
| 58. | MOORFIELDS EYE HOSPITAL NHS FOUNDATION TRUST          | Roxanne     | Crosby-Nwaobi  |
|     |                                                       | Chloe       | Reeks          |
| 59. | NHS BORDERS                                           | Joy         | Dawson         |
|     |                                                       | Lauren      | Finlayson      |
| 60. | NHS FIFE                                              | Susan       | Fowler         |
|     |                                                       | Devesh      | Dhasmana       |
| 61. | NHS FORTH VALLEY                                      | Euan        | Cameron        |
|     |                                                       | Anne        | Todd           |
| 62. | NHS GRAMPIAN                                          | Lynne       | Walker         |
|     |                                                       | Vhairi      | Bateman        |
| 63. | NHS GREATER GLASGOW AND CLYDE                         | Antonia     | Ho             |
|     |                                                       | Michael     | Murphy         |
| 64. | NHS HIGHLAND                                          | David       | Dytmer         |
|     |                                                       | Alexandra   | Cochrane       |

|     |                                                               |           |                  |
|-----|---------------------------------------------------------------|-----------|------------------|
| 65. | NHS LANARKSHIRE                                               | Manish    | Patel            |
|     |                                                               | Karen     | Black            |
| 66. | NHS Lothian                                                   | Kate      | Templeton        |
|     |                                                               | Jane      | Crowe            |
| 67. | NHS WESTERN ISLES                                             | Martin    | Malcolm          |
|     |                                                               | Joan      | Frieslick        |
| 68. | NORFOLK AND NORWICH UNIVERSITY HOSPITALS NHS FOUNDATION TRUST | Ngozi     | Elumogo          |
|     |                                                               | Louise    | Coke             |
| 69. | NORTH CUMBRIA INTEGRATED CARE NHS FOUNDATION TRUST            | Beverly   | Wilkinson        |
|     |                                                               | John      | Elliott          |
| 70. | NORTH MIDDLESEX UNIVERSITY HOSPITAL NHS TRUST                 | Mariyam   | Mirfenderesky    |
|     |                                                               | Pratap    | Harbham          |
| 71. | NORTH WEST ANGLIA NHS FOUNDATION TRUST                        | Janki     | Bhayani          |
|     |                                                               | Stephanie | Diaz             |
| 72. | NORTHERN DEVON HEALTHCARE NHS TRUST                           | M.        | Howard           |
|     |                                                               | T.        | Lewis            |
| 73. | NORTHERN HEALTH AND SOCIAL CARE TRUST                         | Elinor    | Hanna            |
|     |                                                               | Frances   | Johnston         |
| 74. | NORTHERN LINCOLNSHIRE AND GOOLE NHS FOUNDATION TRUST          | Jonathan  | Hatton           |
|     |                                                               | Peter     | Cowling          |
| 75. | NOTTINGHAM UNIVERSITY HOSPITALS NHS TRUST                     | Sarah     | Brand            |
|     |                                                               | Imogen    | Gould            |
| 76. | POOLE HOSPITAL NHS FOUNDATION TRUST                           | Megan     | Woolcook         |
|     |                                                               | Maxine    | Ashton           |
| 77. | PORTSMOUTH HOSPITALS NHS TRUST                                | Allison   | Dimmer           |
|     |                                                               | Karen     | Hudson           |
| 78. | POWYS TEACHING LHB                                            | Jayne     | Goodwin          |
|     |                                                               | Chris     | Norman           |
| 79. | QUEEN VICTORIA HOSPITAL NHS FOUNDATION TRUST                  | J.        | Giles            |
|     |                                                               | G.        | Pottinger        |
| 80. | ROYAL BERKSHIRE NHS FOUNDATION TRUST                          | Maya      | Joseph           |
|     |                                                               | Holly     | Coles            |
| 81. | ROYAL CORNWALL HOSPITALS NHS TRUST                            | H.        | Chenoweth        |
|     |                                                               | D.        | Browne           |
| 82. | ROYAL DEVON AND EXETER NHS FOUNDATION TRUST                   | Cressida  | Auckland         |
|     |                                                               | Stephanie | Prince           |
| 83. | ROYAL FREE LONDON NHS FOUNDATION TRUST                        | Alison    | Rodger           |
|     |                                                               | Tabitha   | Mahungu          |
| 84. | ROYAL NATIONAL ORTHOPAEDIC HOSPITAL NHS TRUST                 | Esther    | Hanison          |
|     |                                                               | Simon     | Warren           |
| 85. | ROYAL PAPWORTH HOSPITAL NHS FOUNDATION TRUST                  | Allison   | Doel             |
|     |                                                               | Kitty     | Paques           |
| 86. | ROYAL SURREY COUNTY HOSPITAL NHS FOUNDATION TRUST             | Charlie   | Piercy           |
|     |                                                               | Esther    | Tarr             |
| 87. | ROYAL UNITED HOSPITALS BATH NHS FOUNDATION TRUST              | Julia     | Vasant           |
|     |                                                               | Deborah   | Howcroft         |
| 88. | SALISBURY NHS FOUNDATION TRUST                                | Catherine | Thompson         |
|     |                                                               | Sophia    | Strong-Sheldrake |
| 89. | SANDWELL AND WEST BIRMINGHAM HOSPITALS NHS TRUST              | Masood    | Aga              |
|     |                                                               | James     | Pethick          |
| 90. | SHEFFIELD CHILDREN'S NHS FOUNDATION TRUST                     | S.        | Gormley          |
|     |                                                               | C.        | Kerrison         |
| 91. | SHEFFIELD TEACHING HOSPITALS NHS FOUNDATION TRUST             | Thushan   | de Silva         |
|     |                                                               | Simon     | Tazzyman         |
| 92. | SHERWOOD FOREST HOSPITALS NHS FOUNDATION TRUST                | Lynne     | Allsop           |
|     |                                                               | Shrikant  | Ambalkar         |
| 93. | SHREWSBURY AND TELFORD HOSPITAL NHS TRUST                     | Mandy     | Beekes           |
|     |                                                               | Hannah    | Gibson           |

|      |                                                                           |                          |                 |
|------|---------------------------------------------------------------------------|--------------------------|-----------------|
| 94.  | SHROPSHIRE COMMUNITY HEALTH NHS TRUST                                     | Johanne                  | Tomlinson       |
| 95.  | SOLENT NHS TRUST                                                          | Cathy                    | Price           |
|      |                                                                           | The Solent Research Team |                 |
| 96.  | SOMERSET NHS FOUNDATION TRUST                                             | Justin                   | Pepperell       |
|      |                                                                           | Kate                     | James           |
| 97.  | SOUTH EASTERN HEALTH AND SOCIAL CARE                                      | Yuri                     | Protaschik      |
|      |                                                                           | Tom                      | Trinick         |
| 98.  | SOUTHEND UNIVERSITY HOSPITAL NHS FOUNDATION TRUST                         | Paula                    | Harman          |
|      |                                                                           | Joanne                   | Galliford       |
| 99.  | SOUTHERN HEALTH AND SOCIAL CARE TRUST                                     | Angel                    | Boulos          |
|      |                                                                           | Fiona                    | Thompson        |
| 100. | SOUTHERN HEALTH NHS FOUNDATION TRUST                                      | Qi                       | Zheng           |
|      |                                                                           | Danielle                 | McCracken       |
| 101. | SOUTHPORT AND ORMSKIRK HOSPITAL NHS TRUST                                 | Katherine                | Gray            |
|      |                                                                           | Kerryanne                | Brown           |
| 102. | ST GEORGE'S UNIVERSITY HOSPITALS NHS FOUNDATION TRUST                     | Tim                      | Planche         |
|      |                                                                           | Angela                   | Houston         |
| 103. | ST HELENS AND KNOWSLEY TEACHING HOSPITALS NHS TRUST                       | Rowan                    | Pritchard Jones |
|      |                                                                           | Diane                    | Wycherley       |
| 104. | STOCKPORT NHS FOUNDATION TRUST                                            | Barzo                    | Faris           |
| 105. | SURREY AND SUSSEX HEALTHCARE NHS TRUST                                    | K.                       | Nimako          |
|      |                                                                           | B.                       | Stewart         |
| 106. | SWANSEA BAY UNIVERSITY LHB                                                | Claire                   | Stafford        |
|      |                                                                           | Steve                    | Bain            |
| 107. | THE CLATTERBRIDGE CANCER CENTRE NHS FOUNDATION TRUST                      | Sheena                   | Khanduri        |
|      |                                                                           | Nagesh                   | Kalakonda       |
| 108. | THE DUDLEY GROUP NHS FOUNDATION TRUST                                     | Helen                    | Ashby           |
| 109. | THE HILLINGDON HOSPITALS NHS FOUNDATION TRUST                             | Natasha                  | Mahabir         |
| 110. | THE NEWCASTLE UPON TYNE HOSPITALS NHS FOUNDATION TRUST                    | J.                       | Harwood         |
|      |                                                                           | B.                       | Payne           |
| 111. | THE PRINCESS ALEXANDRA HOSPITAL NHS TRUST                                 | Kathryn                  | Court           |
|      |                                                                           | Nikki                    | White           |
| 112. | THE ROBERT JONES AND AGNES HUNT ORTHOPAEDIC HOSPITAL NHS FOUNDATION TRUST | Ruth                     | Longfellow      |
| 113. | THE ROYAL BOURNEMOUTH AND CHRISTCHURCH HOSPITALS NHS FOUNDATION TRUST     | Mihye                    | Lee             |
| 114. | THE ROYAL WOLVERHAMPTON NHS TRUST                                         | Marie                    | Green           |
|      |                                                                           | Lauren                   | Hughes          |
| 115. | TORBAY AND SOUTH DEVON NHS FOUNDATION TRUST                               | Mathew                   | Halkes          |
|      |                                                                           | Pauline                  | Mercer          |
| 116. | UNITED LINCOLNSHIRE HOSPITALS NHS TRUST                                   | Alun                     | Roebuck         |
|      |                                                                           | ULHT Research Team       |                 |
| 117. | UNIVERSITY HOSPITAL SOUTHAMPTON NHS FOUNDATION TRUST                      | E.                       | Wilson-Davies   |
| 118. | UNIVERSITY HOSPITALS BRISTOL AND WESTON NHS FOUNDATION TRUST              | Rajeka                   | Lazarus         |
|      |                                                                           | Aaran                    | Sinclair        |
| 119. | UNIVERSITY HOSPITALS COVENTRY AND WARWICKSHIRE NHS TRUST                  | N.                       | Aldridge        |
|      |                                                                           | L.                       | Berry           |
| 120. | UNIVERSITY HOSPITALS OF DERBY AND BURTON NHS FOUNDATION TRUST             | F.                       | Game            |
|      |                                                                           | T.                       | Reynolds        |
| 121. | UNIVERSITY HOSPITALS OF LEICESTER                                         | Christopher              | Holmes          |

|      |                                                                  |             |            |
|------|------------------------------------------------------------------|-------------|------------|
|      | NHS TRUST                                                        | Martin      | Wiselka    |
| 122. | UNIVERSITY HOSPITALS OF MORECAMBE<br>BAY NHS FOUNDATION TRUST    | Andrew      | Higham     |
|      |                                                                  | Lisa        | Bishop     |
| 123. | UNIVERSITY HOSPITALS OF NORTH<br>MIDLANDS NHS TRUST              | Christopher | Duff       |
|      |                                                                  | Joanne      | Gray       |
| 124. | UNIVERSITY HOSPITALS PLYMOUTH NHS<br>TRUST                       | Hannah      | Jory       |
|      |                                                                  | Penny       | Harris     |
| 125. | VELINDRE NHS Trust                                               | Charlotte   | Young      |
|      |                                                                  | James       | Powell     |
| 126. | WALSALL HEALTHCARE NHS TRUST                                     | Lisa        | Richardson |
|      |                                                                  | Aiden       | Plant      |
| 127. | WARRINGTON AND HALTON TEACHING<br>HOSPITALS NHS FOUNDATION TRUST | Zaman       | Qazzafi    |
|      |                                                                  | Lisa        | Ditchfield |
| 128. | WEST SUFFOLK NHS FOUNDATION<br>TRUST                             | A.          | Moody      |
|      |                                                                  | R.          | Tilley     |
| 129. | WESTERN HEALTH AND SOCIAL CARE<br>TRUST                          | Tracy       | Donaghy    |
|      |                                                                  | Maurice     | O'Kane     |
| 130. | WESTERN SUSSEX HOSPITALS NHS<br>FOUNDATION TRUST                 | R.          | Sierra     |
|      |                                                                  | K.          | Shipman    |
| 131. | WHITTINGTON HEALTH NHS TRUST                                     | Philippa    | Kemsley    |
|      |                                                                  | Zehra'a     | Al-Khafaji |
| 132. | WIRRAL UNIVERSITY TEACHING<br>HOSPITAL NHS FOUNDATION TRUST      | D.          | Harvey     |
|      |                                                                  | Y.          | Huang      |
| 133. | WYE VALLEY NHS TRUST                                             | L.          | Robinson   |
| 134. | YEOVIL DISTRICT HOSPITAL NHS<br>FOUNDATION TRUST                 | Sarah       | Board      |
|      |                                                                  | Andrew      | Broadley   |
| 135. | YORK TEACHING HOSPITAL NHS<br>FOUNDATION TRUST                   | Claire      | Brookes    |
|      |                                                                  | Mags        | Szewczyk   |
